# Supplementary material for: Research on a Hierarchical and Simultaneous Gravity Unloading Method for Antenna Pointing Mechanism
Source: Copernicus journal article supplement (doi:10.5194/ms-8-51-2017), 2017-03-20
Supplement: Supplementary file 1 [file ms-8-51-2017-supplement.zip]

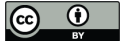

## *Supplement of*

# **Research on a Hierarchical and Simultaneous Gravity Unloading Method for Antenna Pointing Mechanism**

**Guoyong Yang et al.**

*Correspondence to:* Guoyong Yang (ygy2316@163.com)

- ms-8-51-2017-supplement-title-page.pdf
- figure10-in space.txt
- figure10-on the facility.txt
- figure11-in space.txt
- figure11-on the facility.txt
- figure12-in space.txt
- figure12-on the facility.txt
- figure13-in space.txt
- figure13-on the facility.txt
- figure18.txt
- figure9.txt
- table5.txt

The copyright of individual parts of the supplement might differ from the CC-BY 3.0 licence.
